## Retraction: The role of CEUS in characterization of superficial lymph nodes: a single center prospective study

**Giorgio de Stefano, Umberto Scognamiglio, Filomena Di Martino, Roberto Parrella, Francesco Scarano, Giuseppe Signoriello and Nunzia Farella**

Copyright: Stefano, et al. This is an open-access article distributed under the terms of the Creative Commons Attribution License 3.0 (CC BY 3.0), which permits unrestricted use, distribution, and reproduction in any medium, provided the original author and source are credited.

**Retraction:** Data in this paper was plagiarized from “Clinical application of contrast-enhanced ultrasonography in diagnosis of superficial lymphadenopathy,” in the *Journal of Ultrasound in Medicine*. 2010; 29:735-40.

**Footnotes:** The online version of the original article can be found under doi.

Original article: Oncotarget. 2016; 7:52416-52422. doi: 10.18632/oncotarget.9385
